# Supplementary material for: He-Wei granules inhibit chemotherapy-induced vomiting (CINV) in rats by reducing oxidative stress and regulating 5-HT, substance P, ghrelin and obestatin
Source: Royal Society of Chemistry journal article supplement (doi:10.1039/c7ra06312a), 2017-01-01
Supplement: c7ra06312a1.pdf [file c7ra06312a1.pdf]

**He-Wei granules inhibit chemotherapy-induced vomiting (CINV) in rats by reducing oxidative stress and regulating 5-HT, substance P, ghrelin and obestatin**

Zehai Song<sup>1,2</sup>, Hang Chang<sup>1</sup>, Na Han<sup>1</sup>, Zhihui Liu<sup>1</sup>, Zhonglin Wang<sup>1</sup>, Hao Gao<sup>1</sup>, Jun Yin<sup>1,2\*</sup>

<sup>1</sup>Development and Utilization Key Laboratory of Northeast Plant Materials, School of Traditional Chinese Materia Medica, Shenyang Pharmaceutical University, Shenyang 110016, China.

<sup>2</sup>School of Chinese Materia Medica, Guangzhou University of Chinese Medicine.

\* Corresponding author

Prof. Jun Yin

School of Traditional Chinese Materia Medica 48<sup>#</sup>, Shenyang Pharmaceutical University, Wenhua Road 103, Shenhe District, Shenyang 110016, China

TEL Numb: +86-24-2398-6491

FAX Numb: +86-24-2398-6460

E-mail: [yinjun2002@yahoo.com](mailto:yinjun2002@yahoo.com)

**Supplementary Table S1** Effect of HWKL on kaolin consumptions at different time periods in cisplatin-treated rats ( $\bar{X} \pm \text{SEM}$ , g)

| groups      | blank                   | cisplatin                        | cisplatin +<br>ondansetron       | cisplatin +<br>domperidone   | cisplatin +<br>BXXXT         | cisplatin +<br>hwkl low dose     | cisplatin +<br>hwkl middle<br>dose | cisplatin +<br>hwkl high<br>dose | hwkl                   |
|-------------|-------------------------|----------------------------------|----------------------------------|------------------------------|------------------------------|----------------------------------|------------------------------------|----------------------------------|------------------------|
| <b>dose</b> |                         | <b>5.0 mg/kg</b>                 | <b>1.3 mg/kg</b>                 | <b>3.0 mg/kg</b>             | <b>1.38 g/kg</b>             | <b>1.18 g/kg</b>                 | <b>2.36 g/kg</b>                   | <b>4.725 g/kg</b>                | <b>2.36 g/kg</b>       |
| <b>-72h</b> | 0.4428 ±<br>0.05544     | 1.7916 ± 0.2921                  | 0.6869 ±<br>0.06425              | 1.6543 ±<br>0.08510          | 0.6832 ±<br>0.08343          | 0.3771 ±<br>0.06601              | 0.8968 ± 0.1916                    | 0.2849 ±<br>0.04512              | 0.5108 ± 0.1002        |
| <b>-48h</b> | 0.05141 ±<br>0.007906   | 0.09878 ±<br>0.01135             | 0.02948 ±<br>0.01135             | 0.03692 ±<br>0.01469         | 0.02048 ±<br>0.01354         | 0.04983 ±<br>0.001390            | 0.04420 ±<br>0.02510               | 0.03738 ±<br>0.01271             | 0.04072 ±<br>0.01637   |
| <b>-24h</b> | 0.03203 ±<br>0.01132    | 0.006817 ±<br>0.003867           | 0.01900 ±<br>0.01302             | 0.01216 ±<br>0.007730        | 0.05007 ±<br>0.02235         | 0.004083 ±<br>0.001696           | 0.002600 ±<br>0.003932             | 0.008433 ±<br>0.007596           | 0.02928 ±<br>0.003952  |
| <b>0h</b>   | 0.001167 ±<br>0.0004295 | 0.01718 ±<br>0.008207            | 0.1222 ± 0.1131                  | 0.02388 ±<br>0.01295         | 0.02423 ±<br>0.02339         | 0.03688 ±<br>0.02583             | 0.01422 ±<br>0.003435              | 0.01852 ±<br>0.01301             | 0.007050 ±<br>0.001255 |
| <b>24h</b>  | 0.01187 ±<br>0.006177   | 6.9167 ±<br>0.39366 <sup>d</sup> | 0.9950 ±<br>0.08536 <sup>h</sup> | 2.5109 ± 0.1382 <sup>h</sup> | 3.7351 ± 0.1936 <sup>h</sup> | 2.7346 ±<br>0.08057 <sup>h</sup> | 1.7276 ±<br>0.02531 <sup>h</sup>   | 2.0221 ±<br>0.05639 <sup>h</sup> | 0.01335 ±<br>0.006185  |

|             |            |                              |                              |                              |                              |                      |                              |                       |            |
|-------------|------------|------------------------------|------------------------------|------------------------------|------------------------------|----------------------|------------------------------|-----------------------|------------|
| <b>48h</b>  | 0.01852 ±  | 5.3283 ± 0.320 <sup>d</sup>  | 1.5008 ±                     | 1.8495 ± 0.1262 <sup>h</sup> | 3.1077 ± 0.2032 <sup>h</sup> | 1.5861 ±             | 1.1575 ±                     | 1.0652 ±              | 0.008817 ± |
|             | 0.01301    |                              | 0.02613 <sup>h</sup>         |                              |                              | 0.02007 <sup>h</sup> | 0.006842 <sup>h</sup>        | 0.01447 <sup>h</sup>  | 0.004809   |
| <b>72h</b>  | 0.07050 ±  | 4.1780 ± 0.3672 <sup>d</sup> | 3.1399 ± 0.1326 <sup>h</sup> | 1.6713 ±                     | 2.3228 ±                     | 1.6173 ±             | 0.9501 ±                     | 0.7895 ±              | 0.02023 ±  |
|             | 0.001255   |                              | 0.04402 <sup>h</sup>         | 0.03989 <sup>h</sup>         | 0.07619 <sup>h</sup>         | 0.02069 <sup>h</sup> | 0.02328 <sup>h</sup>         | 0.005063              |            |
| <b>96h</b>  | 0.004933 ± | 3.9037 ± 0.3492 <sup>d</sup> | 1.4176 ±                     | 1.7169 ±                     | 1.4448 ±                     | 1.3226 ±             | 0.9950 ± 0.1554 <sup>h</sup> | 0.6904 ±              | 0.07570 ±  |
|             | 0.003164   |                              | 0.009471 <sup>h</sup>        | 0.03964 <sup>h</sup>         | 0.05089 <sup>h</sup>         | 0.01400 <sup>h</sup> |                              | 0.01727 <sup>h</sup>  | 0.03801    |
| <b>120h</b> | 0.03073 ±  | 2.4483 ±                     | 1.2920 ±                     | 1.4216 ±                     | 1.1807 ±                     | 0.6205 ±             | 0.3060 ±                     | 0.2604 ±              | 0.07490 ±  |
|             | 0.01605    | 0.08323 <sup>d</sup>         | 0.01766 <sup>h</sup>         | 0.04496 <sup>h</sup>         | 0.01518 <sup>h</sup>         | 0.01951 <sup>h</sup> | 0.003654 <sup>h</sup>        | 0.01252 <sup>h</sup>  | 0.04498    |
| <b>144h</b> | 0.03548 ±  | 2.0460 ±                     | 1.2194 ±                     | 1.5207 ±                     | 1.2544 ±                     | 0.5642 ±             | 0.4810 ±                     | 0.1347 ±              | 0.1084 ±   |
|             | 0.03329    | 0.05280 <sup>d</sup>         | 0.01070 <sup>h</sup>         | 0.03511                      | 0.004889 <sup>h</sup>        | 0.02214 <sup>h</sup> | 0.003530 <sup>h</sup>        | 0.001300 <sup>h</sup> | 0.06032    |
| <b>168h</b> | 0.005583 ± | 1.7586 ±                     | 1.5689 ±                     | 1.4226 ±                     | 0.8554 ±                     | 0.3870 ±             | 0.1987 ±                     | 0.1333 ±              | 0.01997 ±  |
|             | 0.002484   | 0.05640 <sup>d</sup>         | 0.08585                      | 0.03284                      | 0.03305 <sup>h</sup>         | 0.01453 <sup>h</sup> | 0.002293 <sup>h</sup>        | 0.002124 <sup>h</sup> | 0.009503   |

Values were represented as Mean ± SEM. a, <sup>#</sup>*p*<0.05, b, <sup>##</sup>*p*<0.01, c, <sup>###</sup>*p*<0.001, d, <sup>####</sup>*p*<0.0001, compared with the blank group, e, <sup>\*</sup>*p*<0.05, f, <sup>\*\*</sup>*p*<0.01, g, <sup>\*\*\*</sup>*p*<0.001, h, <sup>\*\*\*\*</sup>*p*<0.0001, compared with the control group
